# Supplementary material for: Regulation of per and cry Genes Reveals a Central Role for the D-Box Enhancer in Light-Dependent Gene Expression
Source: PLoS One. 2012 Dec 6;7(12):e51278. doi: 10.1371/journal.pone.0051278 (PMC3516543; doi:10.1371/journal.pone.0051278)
Supplement: Table S3 — Cosinor analysis. Period (τ) and Peak (ZT) values for all luciferase reporter constructs analyzed. “N.S.” denotes no statistically significant rhythm detected (p>0.05). (DOC) [file pone.0051278.s007.doc]

**Supplementary Table 3**

| **Construct** | **Period (τ)** | **Peak (ZT)** |
| --- | --- | --- |
| *cry1a-Luc* | 24.60.3 | 9.80.3 |
| *cry1a AP1 mut-Luc* | 24.60.3 | 9.50.1 |
| *cry1a LRR-Luc* | 23.50.6 | 9.60.2 |
| *cry1a LRR D-box mut-Luc* | N.S. | N.S. |
| *AP1-Luc* | N.S. | N.S. |
| *D-boxcry1a-Luc* | 23.80.5 | 9.90.4 |
| *cry1a-Luc Deletion 1* | 23.70.4 | 9.20.4 |
| *cry1a-Luc Deletion 2* | 24.10.2 | 10.00.1 |
| *cry1a-Luc Deletion 3* | 24.10.2 | 9.70.4 |
| *cry1a-Luc Deletion 4* | 24.20.0 | 9.90.0 |
| *cry1a-Luc Deletion 5* | 24.20.0 | 10.20.1 |
| *cry1a-Luc Deletion 6* | 24.20.0 | 10.00.1 |
| *cry1a-Luc Deletion 7* | 24.20.0 | 8.90.0 |
| *cry1a-Luc Deletion 8* | 24.40.3 | 8.80.1 |
| *cry1a-Luc Deletion 9* | 24.00.2 | 9.00.1 |
| *cry1a-Luc Deletion 10* | 24.00.3 | 8.80.1 |
| *cry1a-Luc Deletion 11* | 23.80.6 | 9.00.5 |
| *cry1a-Luc Deletion 12* | 24.50.3 | 6.00.5 |
| *cry1a-Luc Deletion 13* | 24.40.2 | 7.60.3 |
| *cry1a-Luc Deletion 14* | 24.20.0 | 9.00.0 |
| *cry1a-Luc Deletion 15* | 24.20.0 | 8.70.0 |
| *cry1a-Luc Deletion 16* | 23.70.4 | 9.70.1 |
| *cry1a-Luc Deletion 17* | 24.10.2 | 8.90.1 |
| *cry1a LRR-Luc Sub-Deletion 1* | 23.10.3 | 10.00.1 |
| *cry1a LRR-Luc Sub-Deletion 2* | 23.30.0 | 10.10.1 |
| *cry1a LRR-Luc Sub-Deletion 3* | 23.30.0 | 10.10.1 |
| *cry1a LRR-Luc Sub-Deletion 4* | 23.10.3 | 9.40.4 |
| *cry1a LRR-Luc Sub-Deletion 5* | N.S. | N.S. |
| *cry1a LRR-Luc Sub-Deletion 6* | N.S. | N.S. |
| *cry1a LRR-Luc Sub-Deletion 7* | 22.90.0 | 8.10.2 |
| *cry1a LRR-Luc Sub-Deletion 8* | 23.60.3 | 9.10.1 |
| *cry1a LRR-Luc Sub-Deletion 9* | 23.60.3 | 8.60.2 |
| *cry1a LRR-Luc Sub-Deletion 10* | 23.60.3 | 9.00.1 |
| *cry1a LRR-Luc Sub-Deletion 11* | 23.60.3 | 9.90.1 |
| *cry1a LRR-Luc Sub-Deletion 12* | 23.10.3 | 9.30.3 |
| *cry1a LRR-Luc Sub-Deletion 13* | 23.60.3 | 8.50.1 |
